# Supplementary material for: 28-country global study on associations between cultural characteristics and Recovery College fidelity
Source: PubMed Central journal article supplement (PMC11461659; doi:10.1038/s44184-024-00092-9), 2024-10-08
Supplement: 44184_2024_92_MOESM1_ESM.pdf [file 44184_2024_92_MOESM1_ESM.pdf]

**Supplementary Information 1. Included studies in six reviews about Recovery Colleges (retrieved on MEDLINE, Embase, Cochrane, CINAHL, and PsycINFO on 30 January 2023).**

Included sources in Bester KL, McGlade A, Darragh E. Is co-production working well in recovery colleges? Emergent themes from a systematic narrative review. *The Journal of Mental Health Training, Education and Practice* 2022; **17**(1): 48-60.

|    | Reference                                                                                                                                                                                                                                             | Country   |
|----|-------------------------------------------------------------------------------------------------------------------------------------------------------------------------------------------------------------------------------------------------------|-----------|
| 1  | Cameron J, Hart A, Brooker S, Neale P, Reardon M. Collaboration in the design and delivery of a mental health Recovery College course: experiences of students and tutors. <i>J Ment Health</i> 2018; <b>27</b> (4): 374-81.                          | UK        |
| 2  | Crowther A, Taylor A, Toney R, et al. The impact of Recovery Colleges on mental health staff, services and society. <i>Epidemiology and Psychiatric Sciences</i> 2019; <b>28</b> (5): 481-8.                                                          | UK        |
| 3  | Dalgarno M, Oates J. The meaning of co-production for clinicians: An exploratory case study of Practitioner Trainers in one Recovery College. <i>Journal of Psychiatric and Mental Health Nursing</i> 2018; <b>25</b> (5-6): 349-57.                  | UK        |
| 4  | McGregor J, Repper J, Brown H. "The college is so different from anything I have done". A study of the characteristics of Nottingham Recovery College. <i>The Journal of Mental Health Training, Education and Practice</i> 2014; <b>9</b> (1): 3-15. | UK        |
| 5  | Meddings S, Guglietti S, Lambe H, Byrne D. Student perspectives: recovery college experience. <i>Mental Health and Social Inclusion</i> 2014; <b>18</b> (3): 142-50.                                                                                  | UK        |
| 6  | Meddings S, Byrne D, Barnicoat S, Campbell E, Locks L. Co-delivered and co-produced: creating a recovery college in partnership. <i>The Journal of Mental Health Training, Education and Practice</i> 2014; <b>9</b> (1): 16-25                       | UK        |
| 7  | Perkins AM, Ridler JH, Hammond L, Davies S, Hackmann C. Impacts of attending recovery colleges on NHS staff. <i>Mental Health and Social Inclusion</i> 2017; <b>21</b> (1): 18-24.                                                                    | UK        |
| 8  | Sommer J, Gill K, Stein-Parbury J. Walking side-by-side: Recovery Colleges revolutionising mental health care. <i>Mental Health and Social Inclusion</i> 2018; <b>22</b> (1): 18-26.                                                                  | Australia |
| 9  | Windsor L, Roberts G, Dieppe P. Recovery Colleges – safe, stimulating and empowering. <i>Mental Health and Social Inclusion</i> 2017; <b>21</b> (5): 280-8.                                                                                           | UK        |
| 10 | Zabel E, Donegan G, Lawrence K, French P. Exploring the impact of the recovery academy: a qualitative study of Recovery College experiences. <i>The Journal of Mental Health Training, Education and Practice</i> 2016; <b>11</b> (3): 162-71.        | UK        |

Included sources in Lin E, Harris H, Black G, et al. Evaluating recovery colleges: a co-created scoping review. *Journal of Mental Health* 2022: 1-22.

|   | Reference                                                                                                                                                                                                                    | Country |
|---|------------------------------------------------------------------------------------------------------------------------------------------------------------------------------------------------------------------------------|---------|
| 1 | Bourne P, Meddings S, Whittington A. An evaluation of service use outcomes in a Recovery College. <i>Journal of Mental Health</i> 2018; <b>27</b> (4): 359-66.                                                               | UK      |
| 2 | Burhouse A, Rowland M, Marie Niman H, et al. Coaching for recovery: a quality improvement project in mental healthcare. <i>BMJ Quality Improvement Reports</i> 2015; <b>4</b> (1): u206576.w2641.                            | UK      |
| 3 | Cameron J, Hart A, Brooker S, Neale P, Reardon M. Collaboration in the design and delivery of a mental health Recovery College course: experiences of students and tutors. <i>J Ment Health</i> 2018; <b>27</b> (4): 374-81. | UK      |

|     |                                                                                                                                                                                                                                                                                  |               |
|-----|----------------------------------------------------------------------------------------------------------------------------------------------------------------------------------------------------------------------------------------------------------------------------------|---------------|
| 4   | Critchley A, Dokter D, Odell-Miller H, Power N, Sandford S. Starting from Scratch: Co-production with dramatherapy in a Recovery College. <i>Dramatherapy</i> 2019; <b>40</b> (2): 63-80.                                                                                        | UK            |
| 5   | Cronin P, Stein-Parbury J, Sommer J, Gill KH. What about value for money? A cost benefit analysis of the South Eastern Sydney Recovery and Wellbeing College. <i>Journal of Mental Health</i> 2021: 1-8.                                                                         | Australia     |
| 6   | Dunn EC, Sally Rogers E, Hutchinson DS, et al. Results of an Innovative University-based Recovery Education Program for Adults with Psychiatric Disabilities. <i>Administration and Policy in Mental Health and Mental Health Services Research</i> 2008; <b>35</b> (5): 357-69. | United States |
| 7   | Durbin A, Nisenbaum R, Wang R, Hwang SW, Kozloff N, Stergiopoulos V. Recovery Education for Adults Transitioning From Homelessness: A Longitudinal Outcome Evaluation. <i>Frontiers in Psychiatry</i> 2021; <b>12</b> .                                                          | Canada        |
| 8   | Ebrahim S, Glascott A, Mayer H, Gair E. Recovery Colleges; how effective are they? <i>The Journal of Mental Health Training, Education and Practice</i> 2018; <b>13</b> (4): 209-18.                                                                                             | UK            |
| 9   | Frayn E, Duke J, Smith H, Wayne P, Roberts G. A voyage of discovery: setting up a recovery college in a secure setting. <i>Mental Health and Social Inclusion</i> 2016; <b>20</b> (1): 29-35.                                                                                    | UK            |
| 10  | Hall T, Jordan HL, Reifels L, et al. A Process and Intermediate Outcomes Evaluation of an Australian Recovery College. <i>Journal of Recovery in Mental Health</i> 2018; <b>1</b> (3): 7-20.                                                                                     | Australia     |
| 11  | Harper L, McKeown M. Why make the effort? Exploring recovery college engagement. <i>Mental Health and Social Inclusion</i> 2018; <b>22</b> (1): 27-33.                                                                                                                           | UK            |
| 12  | Hopkins L, Foster A, Nikitin L. The process of establishing Discovery College in Melbourne. <i>Mental Health and Social Inclusion</i> 2018; <b>22</b> (4): 187-94.                                                                                                               | Australia     |
| 13  | Hopkins L, Pedwell G, Lee S. Educational outcomes of Discovery College participation for young people. <i>Mental Health and Social Inclusion</i> 2018; <b>22</b> (4): 195-202.                                                                                                   | Australia     |
| 14  | Hopkins L, Foster A, Belmore S, Anderson S, Wiseman D. Recovery colleges in mental health-care services: an Australian feasibility and acceptability study. <i>Mental Health and Social Inclusion</i> 2022; <b>26</b> (1): 12-22.                                                | Australia     |
| 15  | Kay K, Edgley G. Evaluation of a new recovery college: delivering health outcomes and cost efficiencies via an educational approach. <i>Mental Health and Social Inclusion</i> 2019; <b>23</b> (1): 36-46.                                                                       | UK            |
| 16  | Khan BM, Reid N, Brown R, Kozloff N, Stergiopoulos V. Engaging Adults Experiencing Homelessness in Recovery Education: A Qualitative Analysis of Individual and Program Level Enabling Factors. <i>Frontiers in Psychiatry</i> 2020; <b>11</b> .                                 | Canada        |
| *17 | King T, Meddings S. Survey identifying commonality across international Recovery Colleges. <i>Mental Health and Social Inclusion</i> 2019; <b>23</b> (3): 121-8.                                                                                                                 | International |
| 18  | Lucchi F, Chiaf E, Placentino A, Scarsato G. Programma FOR: A Recovery College in Italy. <i>Journal of Recovery in Mental Health</i> 2018; <b>1</b> (3): 29-37.                                                                                                                  | Italy         |
| 19  | Meddings S, Guglietti S, Lambe H, Byrne D. Student perspectives: recovery college experience. <i>Mental Health and Social Inclusion</i> 2014; <b>18</b> (3): 142-50.                                                                                                             | UK            |

|    |                                                                                                                                                                                                                                                                   |               |
|----|-------------------------------------------------------------------------------------------------------------------------------------------------------------------------------------------------------------------------------------------------------------------|---------------|
| 20 | Meddings S, Campbell E, Guglietti S, et al. From service user to student: The benefits of recovery college. <i>Clinical Psychology Forum</i> 2015; (268): 32–7.                                                                                                   | UK            |
| 21 | Meddings S, Walsh L, Patmore L, McKenzie KLE, Holmes S. To what extent does Sussex Recovery College reflect its community? An equalities and diversity audit. <i>Mental Health and Social Inclusion</i> 2019; <b>23</b> (3): 136-44.                              | UK            |
| 22 | Muir-Cochrane E, Lawn S, Coveney J, Zabeen S, Kortman B, Oster C. Recovery college as a transition space in the journey towards recovery: An Australian qualitative study. <i>Nursing &amp; Health Sciences</i> 2019; <b>21</b> (4): 523-30.                      | Australia     |
| 23 | Newman-Taylor K, Stone N, Valentine P, Hooks Z, Sault K. The Recovery College: A unique service approach and qualitative evaluation. <i>Psychiatr Rehabil J</i> 2016; <b>39</b> (2): 187-90.                                                                      | UK            |
| 24 | Nurser K, Hunt D, Bartlett T. Do recovery college courses help to improve recovery outcomes and reduce self-stigma for individuals who attend? <i>Clinical Psychology Forum</i> 2017; <b>300</b> : 32–7.                                                          | UK            |
| 25 | Peer JE, Gardner M, Autrey S, Calmes C, Goldberg RW. Feasibility of implementing a recovery education center in a Veterans Affairs medical center. <i>Psychiatr Rehabil J</i> 2018; <b>41</b> (2): 135-40.                                                        | United States |
| 26 | Reid N, Castel S, Veldhuizen S, Roberts A, Stergiopoulos V. Effect of a Psychiatric Emergency Department Expansion on Acute Mental Health and Addiction Service Use Trends in a Large Urban Center. <i>Psychiatric Services</i> 2019; <b>70</b> (11): 1053-6.     | Canada        |
| 27 | Sommer J, Gill K, Stein-Parbury J. Walking side-by-side: Recovery Colleges revolutionising mental health care. <i>Mental Health and Social Inclusion</i> 2018; <b>22</b> (1): 18-26.                                                                              | Australia     |
| 28 | Sommer J, Gill KH, Stein-Parbury J, Cronin P, Katsifis V. The role of recovery colleges in supporting personal goal achievement. <i>Psychiatric Rehabilitation Journal</i> 2019; <b>42</b> (4): 394.                                                              | Australia     |
| 29 | Stevens J, Butterfield C, Whittington A, Holttum S. Evaluation of Arts based Courses within a UK Recovery College for People with Mental Health Challenges. <i>International Journal of Environmental Research and Public Health</i> , 2018; <b>15</b> (6): 1170. | UK            |
| 30 | Sutton R, Lawrence K, Zabel E, French P. Recovery College influences upon service users: a Recovery Academy exploration of employment and service use. <i>Journal of Mental Health Training, Education &amp; Practice</i> 2019; <b>14</b> (3): 141-8.             | UK            |
| 31 | Thompson H, Simonds L, Barr S, Meddings S. Recovery colleges: long-term impact and mechanisms of change. <i>Mental Health and Social Inclusion</i> 2021; <b>25</b> (3): 232-42.                                                                                   | UK            |
| 32 | Wilson C, King M, Russell J. A mixed-methods evaluation of a Recovery College in South East Essex for people with mental health difficulties. <i>Health &amp; Social Care in the Community</i> 2019; <b>27</b> (5): 1353-62.                                      | Canada        |
| 33 | Windsor L, Roberts G, Dieppe P. Recovery Colleges – safe, stimulating and empowering. <i>Mental Health and Social Inclusion</i> 2017; <b>21</b> (5): 280-8.                                                                                                       | UK            |

|    |                                                                                                                                                                                                                                                                                                                                                 |         |
|----|-------------------------------------------------------------------------------------------------------------------------------------------------------------------------------------------------------------------------------------------------------------------------------------------------------------------------------------------------|---------|
| 34 | Zabel E, Donegan G, Lawrence K, French P. Exploring the impact of the recovery academy: a qualitative study of Recovery College experiences. <i>The Journal of Mental Health Training, Education and Practice</i> 2016; <b>11</b> (3): 162-71.                                                                                                  | UK      |
| 35 | Secker J, Wilson C. Evaluation of the mid Essex recovery college, October–December 2013. Chelmsford: Anglia Ruskin University, 2014.                                                                                                                                                                                                            | UK      |
| 36 | Arbour S, Stevens A, Gasparini J. Recovery College: Influencing recovery-related outcomes. Culture and System Transformation [PowerPoint] 2019.                                                                                                                                                                                                 | Canada  |
| 37 | Barton S, Williams R. Evaluation of “the exchange” (Barnsley Recovery College). <a href="https://rfact.org.au/wp-content/uploads/2015/05/Evaluation-of-The-Exchange-Barnsley-Recovery-College-SWYFT.pdf">https://rfact.org.au/wp-content/uploads/2015/05/Evaluation-of-The-Exchange-Barnsley-Recovery-College-SWYFT.pdf</a> 2015.               | UK      |
| 38 | Canadian Mental Health Association. Recovery College: <i>White paper</i> . Canadian Mental Health Association 2020.                                                                                                                                                                                                                             | Canada  |
| 39 | Kaminskiy E. Moore S. <i>South Essex Recovery College evaluation project report</i> (pp. 1–53). <a href="https://arro.anglia.ac.uk/id/eprint/600456">https://arro.anglia.ac.uk/id/eprint/600456</a> 2015.                                                                                                                                       | UK      |
| 40 | Kenny B. Kavanagh E. McSherry H. Brady G. Kelly J. MacGabhann L. Griffin M. Farrelly M. Kelly N. Ross P. Barron R. Watters R. Keating S. <i>Informing and transforming communities, shaping the way forward for mental health recovery</i> . Dublin North. North East Recovery College 2020.                                                    | Ireland |
| 41 | Mayo Recovery College. <i>My words, my way</i> . Mayo Recovery College n.d.                                                                                                                                                                                                                                                                     | Ireland |
| 42 | Taylor D. Boland A. Wallace N. <i>Mid West ARIES project: A report on the development, progress and outcomes of a pilot project to provide a recovery education service in the Mid West</i> . University of Limerick 2017.                                                                                                                      | Ireland |
| 43 | Wels J. <i>Recovery College Greenwich – Evaluation report</i> . <a href="https://www.bridgesupport.org/wp-content/uploads/2019/01/Enc-4.1-Greenwich-University-Evaluation-Report-August-2016-Final.pdf">https://www.bridgesupport.org/wp-content/uploads/2019/01/Enc-4.1-Greenwich-University-Evaluation-Report-August-2016-Final.pdf</a> 2016. | UK      |

\*Same study as No. 6 in Thériault’s review in 2020 (full reference below), which categorised the location of this study being in England.

Thériault J, Lord M-M, Briand C, Piat M, Meddings S. Recovery Colleges After a Decade of Research: A Literature Review. *Psychiatric Services* 2020; **71**(9): 928-40.

Included sources in Thériault J, Lord M-M, Briand C, Piat M, Meddings S. Recovery Colleges After a Decade of Research: A Literature Review. *Psychiatric Services* 2020; **71**(9): 928-40.

|   | Authors                                                                                                                                                                                                                                                                                                         | Country |
|---|-----------------------------------------------------------------------------------------------------------------------------------------------------------------------------------------------------------------------------------------------------------------------------------------------------------------|---------|
| 1 | Anfossi A. <i>The current state of Recovery Colleges in the UK</i> . Nottingham, UK, Implementing Recovery Through Organisational Change 2017                                                                                                                                                                   | England |
| 2 | Bourne P, Meddings S, Whittington A. An evaluation of service use outcomes in a Recovery College. <i>Journal of Mental Health</i> 2018; <b>27</b> (4): 359-66.                                                                                                                                                  | England |
| 3 | Chung TE, Eckerle Curwood S, Thang H, Gruszecki S, Beder M, Stergiopoulos V. Introducing a Recovery Education Centre for Adults Experiencing Mental Health Challenges and Housing Instability in a Large Urban Setting. <i>International Journal of Mental Health and Addiction</i> 2016; <b>14</b> (5): 850-5. | Canada  |
| 4 | Dunn EC, Sally Rogers E, Hutchinson DS, et al. Results of an Innovative University-based Recovery Education Program for Adults with Psychiatric                                                                                                                                                                 | England |

|    |                                                                                                                                                                                                                                                                   |           |
|----|-------------------------------------------------------------------------------------------------------------------------------------------------------------------------------------------------------------------------------------------------------------------|-----------|
|    | Disabilities. <i>Administration and Policy in Mental Health and Mental Health Services Research</i> 2008; <b>35</b> (5): 357-69.                                                                                                                                  |           |
| 5  | Kay K, Edgley G. Evaluation of a new recovery college: delivering health outcomes and cost efficiencies via an educational approach. <i>Mental Health and Social Inclusion</i> 2019; <b>23</b> (1): 36-46.                                                        | England   |
| *6 | King T, Meddings S. Survey identifying commonality across international Recovery Colleges. <i>Mental Health and Social Inclusion</i> 2019; <b>23</b> (3): 121-8.                                                                                                  | England   |
| 7  | Meddings S, Campbell E, Guglietti S, et al. From service user to student: The benefits of recovery college. <i>Clinical Psychology Forum</i> 2015; (268): 32–7.                                                                                                   | England   |
| 8  | Meddings S, Walsh L, Patmore L, McKenzie KLE, Holmes S. To what extent does Sussex Recovery College reflect its community? An equalities and diversity audit. <i>Mental Health and Social Inclusion</i> 2019; <b>23</b> (3): 136-44.                              | England   |
| 9  | Nurser K, Hunt D, Bartlett T. Do recovery college courses help to improve recovery outcomes and reduce self-stigma for individuals who attend? <i>Clinical Psychology Forum</i> 2017; <b>300</b> : 32–7.                                                          | England   |
| 10 | Sommer J, Gill KH, Stein-Parbury J, Cronin P, Katsifis V. The role of recovery colleges in supporting personal goal achievement. <i>Psychiatric Rehabilitation Journal</i> 2019; <b>42</b> (4): 394.                                                              | Australia |
| 11 | Burhouse A, Rowland M, Marie Niman H, et al. Coaching for recovery: a quality improvement project in mental healthcare. <i>BMJ Quality Improvement Reports</i> 2015; <b>4</b> (1): u206576.w2641.                                                                 | England   |
| 12 | Ebrahim S, Glascott A, Mayer H, Gair E. Recovery Colleges; how effective are they? <i>The Journal of Mental Health Training, Education and Practice</i> 2018; <b>13</b> (4): 209-18.                                                                              | England   |
| 13 | Hall T, Jordan HL, Reifels L, et al. A Process and Intermediate Outcomes Evaluation of an Australian Recovery College. <i>Journal of Recovery in Mental Health</i> 2018; <b>1</b> (3): 7-20.                                                                      | Australia |
| 14 | Hopkins L, Pedwell G, Lee S. Educational outcomes of Discovery College participation for young people. <i>Mental Health and Social Inclusion</i> 2018; <b>22</b> (4): 195-202.                                                                                    | Australia |
| 15 | Lucchi F, Chiaf E, Placentino A, Scarsato G. Programma FOR: A Recovery College in Italy. <i>Journal of Recovery in Mental Health</i> 2018; <b>1</b> (3): 29-37.                                                                                                   | Italy     |
| 16 | Meddings S, Guglietti S, Lambe H, Byrne D. Student perspectives: recovery college experience. <i>Mental Health and Social Inclusion</i> 2014; <b>18</b> (3): 142-50.                                                                                              | England   |
| 17 | Perkins AM, Ridler JH, Hammond L, Davies S, Hackmann C. Impacts of attending recovery colleges on NHS staff. <i>Mental Health and Social Inclusion</i> 2017; <b>21</b> (1): 18-24.                                                                                | England   |
| 18 | Stevens J, Butterfield C, Whittington A, Holttum S. Evaluation of Arts based Courses within a UK Recovery College for People with Mental Health Challenges. <i>International Journal of Environmental Research and Public Health</i> , 2018; <b>15</b> (6): 1170. | England   |
| 19 | Cameron J, Hart A, Brooker S, Neale P, Reardon M. Collaboration in the design and delivery of a mental health Recovery College course: experiences of students and tutors. <i>J Ment Health</i> 2018; <b>27</b> (4): 374-81.                                      | England   |
| 20 | Crowther A, Taylor A, Toney R, et al. The impact of Recovery Colleges on mental health staff, services and society. <i>Epidemiology and Psychiatric Sciences</i> 2019; <b>28</b> (5): 481-8.                                                                      | England   |
| 21 | Dalgarno M, Oates J. The meaning of co-production for clinicians: An exploratory case study of Practitioner Trainers in one Recovery College. <i>Journal of Psychiatric and Mental Health Nursing</i> 2018; <b>25</b> (5-6): 349-57.                              | England   |
| 22 | Frayn E, Duke J, Smith H, Wayne P, Roberts G. A voyage of discovery: setting up a recovery college in a secure setting. <i>Mental Health and Social Inclusion</i> 2016; <b>20</b> (1): 29-35.                                                                     | England   |

|    |                                                                                                                                                                                                                                                |           |
|----|------------------------------------------------------------------------------------------------------------------------------------------------------------------------------------------------------------------------------------------------|-----------|
| 23 | Gill KH. Recovery colleges, co-production in action: The value of the lived experience in “learning and growth for mental health”. <i>Health Issues</i> 2014; (113): 10-4.                                                                     | Australia |
| 24 | Harper L, McKeown M. Why make the effort? Exploring recovery college engagement. <i>Mental Health and Social Inclusion</i> 2018; <b>22</b> (1): 27-33.                                                                                         | England   |
| 25 | Martina T. Poetry for recovery: Peer trainer reflections at Sussex Recovery College. <i>Clinical psychology forum</i> 2015; <b>268</b> : 28-31.                                                                                                | England   |
| 26 | Newman-Taylor K, Stone N, Valentine P, Hooks Z, Sault K. The Recovery College: A unique service approach and qualitative evaluation. <i>Psychiatr Rehabil J</i> 2016; <b>39</b> (2): 187-90.                                                   | England   |
| 27 | Nurser K, Rushworth I, Shakespeare T, Williams D. Personal storytelling in mental health recovery. <i>Mental Health Review Journal</i> 2018; <b>23</b> (1): 25-36.                                                                             | England   |
| 28 | Sommer J, Gill K, Stein-Parbury J. Walking side-by-side: Recovery Colleges revolutionising mental health care. <i>Mental Health and Social Inclusion</i> 2018; <b>22</b> (1): 18-26.                                                           | Australia |
| 29 | Toney R, Elton D, Munday E, et al. Mechanisms of Action and Outcomes for Students in Recovery Colleges. <i>Psychiatric Services</i> 2018; <b>69</b> (12): 1222-9.                                                                              | England   |
| 30 | Windsor L, Roberts G, Dieppe P. Recovery Colleges – safe, stimulating and empowering. <i>Mental Health and Social Inclusion</i> 2017; <b>21</b> (5): 280-8.                                                                                    | England   |
| 31 | Zabel E, Donegan G, Lawrence K, French P. Exploring the impact of the recovery academy: a qualitative study of Recovery College experiences. <i>The Journal of Mental Health Training, Education and Practice</i> 2016; <b>11</b> (3): 162-71. | England   |

\*Same study as No. 17 in Lin’s review in 2022 (full reference below), which categorised this study as an international study.

Lin E, Harris H, Black G, et al. Evaluating recovery colleges: a co-created scoping review. *Journal of Mental Health* 2022: 1-22.

Included sources in

Crowther A, Taylor A, Toney R, et al. The impact of Recovery Colleges on mental health staff, services and society. *Epidemiology and Psychiatric Sciences* 2019; **28**(5): 481-8., and Toney R, Elton D, Munday E, et al. Mechanisms of Action and Outcomes for Students in Recovery Colleges. *Psychiatric Services* 2018; **69**(12): 1222-9. (Same 44 sources)

|   | <b>Authors</b>                                                                                                                                                                                                                                        | <b>Country</b> |
|---|-------------------------------------------------------------------------------------------------------------------------------------------------------------------------------------------------------------------------------------------------------|----------------|
| 1 | Frayn E, Duke J, Smith H, Wayne P, Roberts G. A voyage of discovery: setting up a recovery college in a secure setting. <i>Mental Health and Social Inclusion</i> 2016; <b>20</b> (1): 29-35.                                                         | UK             |
| 2 | Perkins R, Repper J. When is a “recovery college” not a “recovery college”? <i>Mental Health and Social Inclusion</i> 2017; <b>21</b> (2): 65-72.                                                                                                     | UK             |
| 3 | Meddings S, Campbell E, Guglietti S, et al. From service user to student: The benefits of recovery college. <i>Clinical Psychology Forum</i> 2015; (268): 32–7.                                                                                       | UK             |
| 4 | Taggart H, Kempton J. The Route to Employment: The Role of Mental Health Recovery Colleges. London: CentreForum; 2015.                                                                                                                                | UK             |
| 5 | North Essex Research Network. Evaluation of the Mid Essex Recovery College October–December 2013. Essex: North Essex Research Network; 2014.                                                                                                          | UK             |
| 6 | The Dorset Wellbeing and Recovery Partnership (WaRP). WaRP Magazine. 2016.                                                                                                                                                                            | UK             |
| 7 | McGregor J, Repper J, Brown H. “The college is so different from anything I have done”. A study of the characteristics of Nottingham Recovery College. <i>The Journal of Mental Health Training, Education and Practice</i> 2014; <b>9</b> (1): 3-15. | UK             |
| 8 | Oh H. The pedagogy of recovery colleges: clarifying theory. <i>Mental Health Review Journal</i> 2013; <b>18</b> (4).                                                                                                                                  | UK             |

|    |                                                                                                                                                                                                                                                                                  |           |
|----|----------------------------------------------------------------------------------------------------------------------------------------------------------------------------------------------------------------------------------------------------------------------------------|-----------|
| 9  | Skipper L, Page K. Our recovery journey: two stories of change within Norfolk and Suffolk NHS Foundation Trust. <i>Mental Health and Social Inclusion</i> 2015; <b>19</b> (1): 38-44.                                                                                            | UK        |
| 10 | Watson E. What Makes a Recovery College? A Systematic Literature Review of Recovery Education in Mental Health [Dissertation]. Nottingham: University of Nottingham; 2013.                                                                                                       | UK        |
| 11 | Kelly J, Gallagher S, McMahon J. Developing a recovery college: a preliminary exercise in establishing regional readiness and community needs. <i>Journal of Mental Health</i> 2017; <b>26</b> (2): 150-5.                                                                       | UK        |
| 12 | Dunn EC, Sally Rogers E, Hutchinson DS, et al. Results of an Innovative University-based Recovery Education Program for Adults with Psychiatric Disabilities. <i>Administration and Policy in Mental Health and Mental Health Services Research</i> 2008; <b>35</b> (5): 357-69. | UK        |
| 13 | Hall T, Brophy L, Jordan H. A report on the early outcomes of the Mind Recovery College. Melbourne: Centre for Mental Health, Melbourne School of Population and Global Health, 2016.                                                                                            | Australia |
| 14 | Hall T, Brophy L, Jordan H, et al. Co-Producing The Journey To Recovery: The Mind Recovery College, Australia. TheMHS Conference 2016; 2016; Auckland, Australia: TheMHS Learning Network Inc.; 2016.                                                                            | Australia |
| 15 | McGregor J, Brophy L, Hardy D, et al. Proceedings of June 2015 Meeting. Recovery Colleges International Community of Practice (RCICoP); 2015; 2015.                                                                                                                              | UK        |
| 16 | Mind. Australasian Recovery College Community of Practice Inaugural Meeting. Victoria: Mind; 2016.                                                                                                                                                                               | Australia |
| 17 | Newman-Taylor K, Stone N, Valentine P, Hooks Z, Sault K. The Recovery College: A unique service approach and qualitative evaluation. <i>Psychiatr Rehabil J</i> 2016; <b>39</b> (2): 187-90.                                                                                     | UK        |
| 18 | Shepherd G, McGregor J. Recovery Colleges – Evolution or Revolution?. Ghent, November 9; 2016.                                                                                                                                                                                   | UK        |
| 19 | Sussex Recovery College. Performance and Evaluation Report (Summer Term 2016); Brighton: Sussex Partnership NHS Foundation Trust; 2016                                                                                                                                           | UK        |
| 20 | Thornhill H, Dutta A. Are recovery colleges socially acceptable? <i>BJPsych International</i> 2016; <b>13</b> (1): 6-7.                                                                                                                                                          | UK        |
| 21 | Zabel E, Donegan G, Lawrence K, French P. Exploring the impact of the recovery academy: a qualitative study of Recovery College experiences. <i>The Journal of Mental Health Training, Education and Practice</i> 2016; <b>11</b> (3): 162-71.                                   | UK        |
| 22 | Burhouse A, Rowland M, Marie Niman H, et al. Coaching for recovery: a quality improvement project in mental healthcare. <i>BMJ Quality Improvement Reports</i> 2015; <b>4</b> (1): u206576.w2641.                                                                                | UK        |
| 23 | Central and North West London NHS Foundation Trust (2015) CNWL Recovery & Wellbeing College Annual Report April 2014 - July 2015.                                                                                                                                                | UK        |
| 24 | Kaminskiy E, Moore S. South Essex recovery college evaluation. Chelmsford, UK.: Anglia Ruskin University, 2015.                                                                                                                                                                  | UK        |
| 25 | King T. An exploratory study of co-production in recovery colleges in the UK. Sussex: University of Brighton.; 2015.                                                                                                                                                             | UK        |
| 26 | Meddings S, Campbell E, Guglietti S, et al. From service user to student: The benefits of recovery college. <i>Clinical Psychology Forum</i> 2015; (268): 32–7.                                                                                                                  | UK        |
| 27 | Gill KH. Recovery colleges, co-production in action: The value of the lived experience in “learning and growth for mental health”. <i>Health Issues</i> 2014; (113): 10-4.                                                                                                       | Australia |
| 28 | McCaig M, McNay L, Marland G, Bradstreet S, Campbell J. Establishing a recovery college in a Scottish University. <i>Mental Health and Social Inclusion</i> 2014; <b>18</b> (2): 92-7.                                                                                           | UK        |

|    |                                                                                                                                                                                                                                  |           |
|----|----------------------------------------------------------------------------------------------------------------------------------------------------------------------------------------------------------------------------------|-----------|
| 29 | McMahon J, Wallace N, Kelly J, Egan E. Recovery education college: a needs analysis. Dublin: Health Service Executive, 2014.                                                                                                     | Ireland   |
| 30 | Meddings S, Byrne D, Barnicoat S, Campbell E, Locks L. Co-delivered and co-produced: creating a recovery college in partnership. <i>The Journal of Mental Health Training, Education and Practice</i> 2014; <b>9</b> (1): 16-25. | UK        |
| 31 | Meddings S, Guglietti S, Lambe H, Byrne D. Student perspectives: recovery college experience. <i>Mental Health and Social Inclusion</i> 2014; <b>18</b> (3): 142-50.                                                             | UK        |
| 32 | Rennison J, Skinner S, Bailey A. CNWL Recovery College Annual Report April 2013 - March 2014. London: Central and North West London NHS Foundation Trust., 2014.                                                                 | UK        |
| 33 | Alois Zucchelli F, Skinner S. Central and North West London NHS Foundation Trust's (CNWL) Recovery College: the story so far .... <i>Mental Health and Social Inclusion</i> 2013; <b>17</b> (4): 183-9.                          | UK        |
| 34 | Mind. Establishment of the Mind Recovery College. Heidelberg: Mind Australia, 2012.                                                                                                                                              | Australia |
| 35 | Perkins R, Repper J, Rinaldi M, Brown H. Recovery Colleges. London: Implementing Recovery Through Organisational Change, 2012.                                                                                                   | UK        |
| 36 | Rinaldi M, Morland M, Wybourn S. Annual Report 2011 – 2012 South West London Recovery College, London, South West London and St George's Mental Health NHS Trust. London: National Health Service, 2012.                         | UK        |
| 37 | Rinaldi M, Suleman M. Care co-ordinators' attitudes to self-management and their experience of the use of the South West London Recovery College. London: South West London and St George's Mental Health NHS Trust.; 2012       | UK        |
| 38 | Rinaldi M, Wybourn S. The Recovery College Pilot in Merton and Sutton: longer term individual and service level outcomes. London: South West London and St. Georges Mental Health NHS Trust.; 2011.                              | UK        |
| 39 | Bourne P, Meddings S, Cooper R, Locks L, Whittington A. An evaluation of service use outcomes in Sussex Recovery College. . Sussex: Sussex NHS Trust; 2016.                                                                      | UK        |
| 40 | Bristow E. An annual report of Lincoln Recovery College. Lincoln: Lincolnshire Partnership NHS Foundation Trust, 2015.                                                                                                           | UK        |
| 41 | Martina T. Poetry for recovery: Peer trainer reflections at Sussex Recovery College. <i>Clinical psychology forum</i> 2015; <b>268</b> : 28-31.                                                                                  | UK        |
| 42 | Solent Recovery College. Solent Recovery College, Our first year – Outcomes. . Portsmouth: Solent Recovery College; 2014.                                                                                                        | UK        |
| 43 | Barton, South West Yorkshire Partnership NHS Foundation Trust Recovery College [PowerPoint] n.d.                                                                                                                                 | UK        |
| 44 | Sault, Garner, Gatherer, Southern Health Recovery College [PowerPoint] n.d.                                                                                                                                                      | UK        |

Included sources in Toney R, Knight J, Hamill K, et al. Development and Evaluation of a Recovery College Fidelity Measure. *The Canadian Journal of Psychiatry* 2018; **64**(6): 405-14

| No | Authors                                                                                                                                                                                                                                                       | Country   |
|----|---------------------------------------------------------------------------------------------------------------------------------------------------------------------------------------------------------------------------------------------------------------|-----------|
| 1  | McGregor J, Repper J, Brown H. "The college is so different from anything I have done". A study of the characteristics of Nottingham Recovery College. <i>The Journal of Mental Health Training, Education and Practice</i> 2014; <b>9</b> (1): 3-15.         | UK        |
| 2  | Perkins R, Repper J, Rinaldi M, Brown H. Briefing: Recovery Colleges2012. <a href="https://imroc.org/wp-content/uploads/2022/04/1.Recovery-Colleges.pdf">https://imroc.org/wp-content/uploads/2022/04/1.Recovery-Colleges.pdf</a> (accessed 23 January 2023). | UK        |
| 3  | Mind. Australasian Recovery College Community of Practice Inaugural Meeting. Victoria: Mind; 2016.                                                                                                                                                            | Australia |
| 4  | Meddings S, Campbell E, Guglietti S, et al. From service user to student: The benefits of recovery college. <i>Clinical Psychology Forum</i> 2015; (268): 32–7.                                                                                               | UK        |



|    |                                                                                                                                                                                                                                 |    |
|----|---------------------------------------------------------------------------------------------------------------------------------------------------------------------------------------------------------------------------------|----|
| 5  | Shepherd G, McGregor J, Meddings S, Roeg W. Recovery colleges and co-production. <i>Wellbeing, recovery and mental health</i> 2017: 181-93.                                                                                     | UK |
| 6  | Perkins AM, Ridler JH, Hammond L, Davies S, Hackmann C. Impacts of attending recovery colleges on NHS staff. <i>Mental Health and Social Inclusion</i> 2017; <b>21</b> (1): 18-24.                                              | UK |
| 7  | Shepherd G, Boardman J, Rinaldi M, Roberts G. Supporting recovery in mental health services: Quality and outcomes. <i>London: Implementing Recovery Through Organisational Change</i> 2014.                                     | UK |
| 8  | Leamy M, Bird V, Boutillier CL, Williams J, Slade M. Conceptual framework for personal recovery in mental health: systematic review and narrative synthesis. <i>British Journal of Psychiatry</i> 2011; <b>199</b> (6): 445-52. | UK |
| 9  | McGregor J, Brophy L, Hardy D, et al. Proceedings of June 2015 Meeting. Recovery Colleges International Community of Practice (RCICoP); 2015; 2015.                                                                             | UK |
| 10 | Rinaldi M, Morland M, Wybourn S. Annual Report 2011 – 2012 South West London Recovery College, London, South West London and St George's Mental Health NHS Trust. London: National Health Service, 2012.                        | UK |
| 11 | Watson E. What Makes a Recovery College? A Systematic Literature Review of Recovery Education in Mental Health [Dissertation]. Nottingham: University of Nottingham; 2013.                                                      | UK |
| 12 | Meddings S, Guglietti S, Lambe H, Byrne D. Student perspectives: recovery college experience. <i>Mental Health and Social Inclusion</i> 2014; <b>18</b> (3): 142-50.                                                            | UK |
| 13 | King T. An exploratory study of co-production in recovery colleges in the UK. Sussex: University of Brighton.; 2015.                                                                                                            | UK |

## Supplementary Information 2. Inclusion criteria for Recovery Colleges

| Currently active services that: |                                                                                                                                                                          |
|---------------------------------|--------------------------------------------------------------------------------------------------------------------------------------------------------------------------|
| (a)                             | Targeting to supporting personal recovery, defined as living a purposeful and autonomous life despite the presence of mental health symptom                              |
| (b)                             | Prioritising co-production, defined as individuals with lived experience working with staff or subject experts to design and deliver all aspects of the Recovery College |
| (c)                             | Prioritising adult learning approaches, in which students and trainers work together and learn from each other by sharing experiences, knowledge, and skills             |

These criteria were confirmed by the service managers, who were approached by the research team in the England survey, and by each country lead in the international survey.
